# Supplementary material for: Characteristics of the Discoloration Switching Phenomenon of 4H-SiC Single Crystals Grown by PVT Method Using ToF-SIMS and Micro-Raman Analysis
Source: MDPI journal article supplement (doi:10.3390/ma17051005), 2024-02-22
Supplement: s1 [file s1]

## Supporting Information

### **Characteristics of the Discoloration Switching Phenomenon of 4H-SiC Single Crystals Grown by PVT Method Using ToF-SIMS and Micro-Raman Analysis**

*Seul-Ki Kim<sup>1,2</sup>, Hajun Kim<sup>3</sup>, Hyun Sik Kim<sup>4</sup>, Tae Eun Hong<sup>5</sup>, Younki Lee<sup>3\*</sup>, and Eun Young Jung<sup>6\*</sup>*

<sup>1</sup>Semiconductor Materials Center, Korea Institute of Ceramic Engineering and Technology, Jinju 52851, Republic of Korea

<sup>2</sup>Department of Materials Engineering, Gyeongsang National University, Jinju 52828, Republic of Korea

<sup>3</sup>Department of Materials Engineering and Convergence Technology, Gyeongsang National University, Jinju 52828, Republic of Korea

<sup>4</sup>Analysis and Standards Center, Korea Institute of Ceramic Engineering & Technology, Jinju 52851, Republic of Korea

<sup>5</sup>Division of High-Technology Materials Research, Korea Basic Science Institute, Busan 46742, Republic of Korea

<sup>6</sup>The Institute of Electronic Technology, College of IT Engineering, Kyungpook National University, Daegu 41566, Republic of Korea

\*Correspondence

Younki Lee

Department of Materials Engineering and Convergence Technology, Gyeongsang National University, Jinju 52828, Republic of Korea

E-mail: ylee@gnu.ac.kr

Eun Young Jung

The Institute of Electronic Technology, College of IT Engineering, Kyungpook National University, Daegu 41566, Republic of Korea

E-mail: eyjung@knu.ac.kr

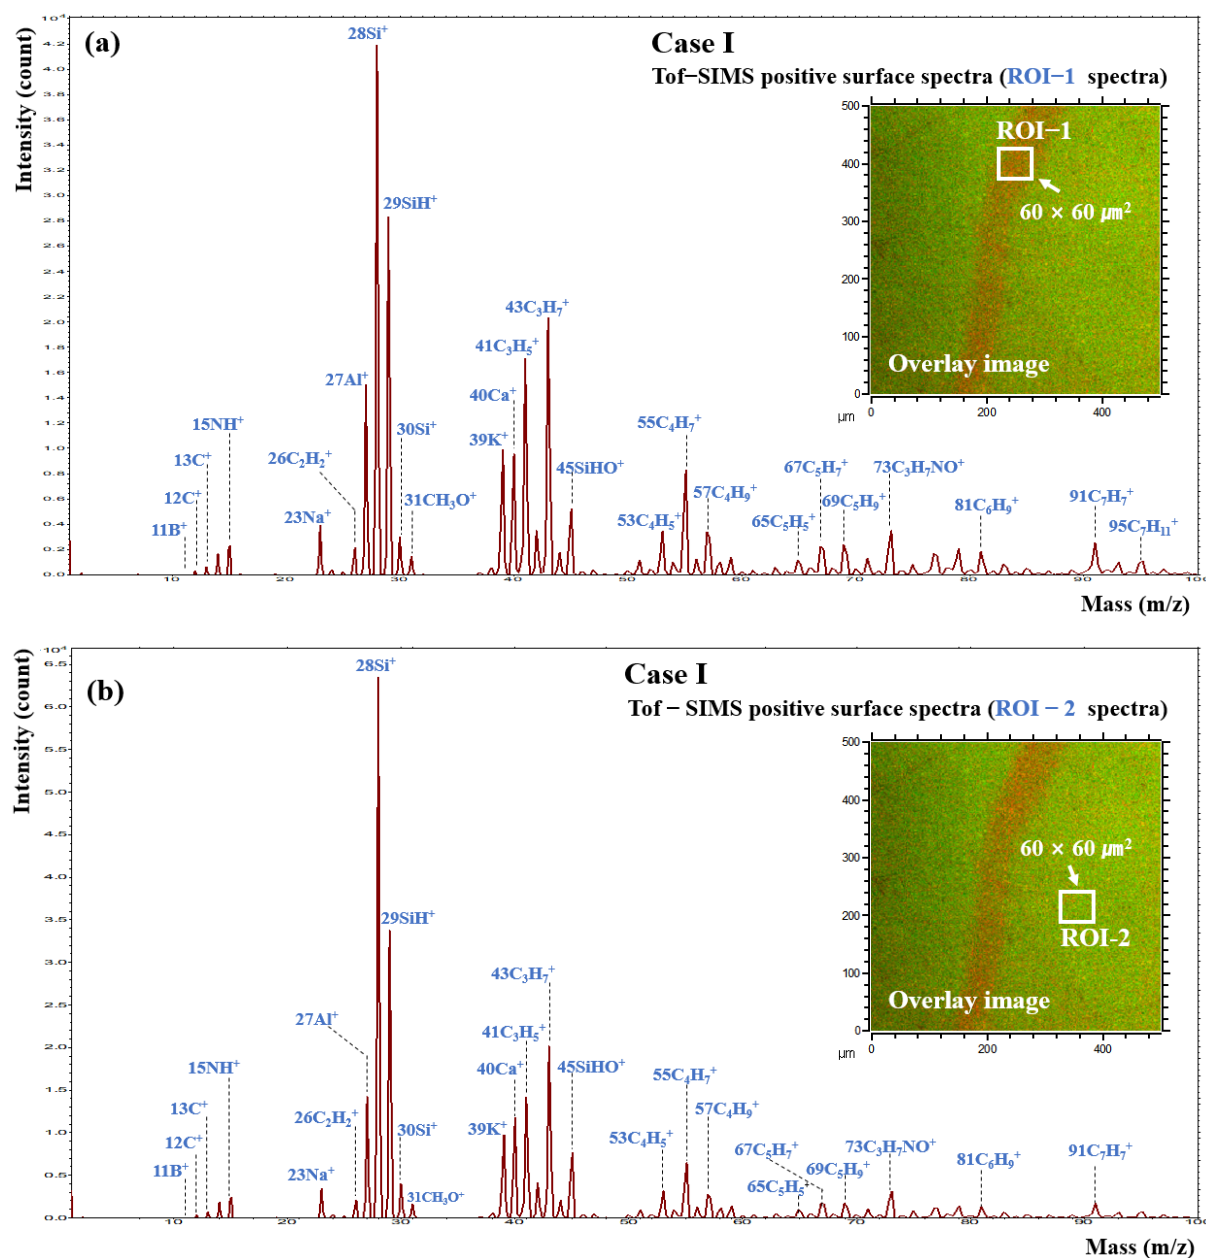

**Figure S1:** ToF-SIMS positive secondary ion spectra recorded over two different regions: (a) ROI-1 and (b) ROI-2. The spectra were acquired from the ToF-SIMS positive secondary ion images obtained using the ToF-SIMS fast imaging mode for Case I (bright).

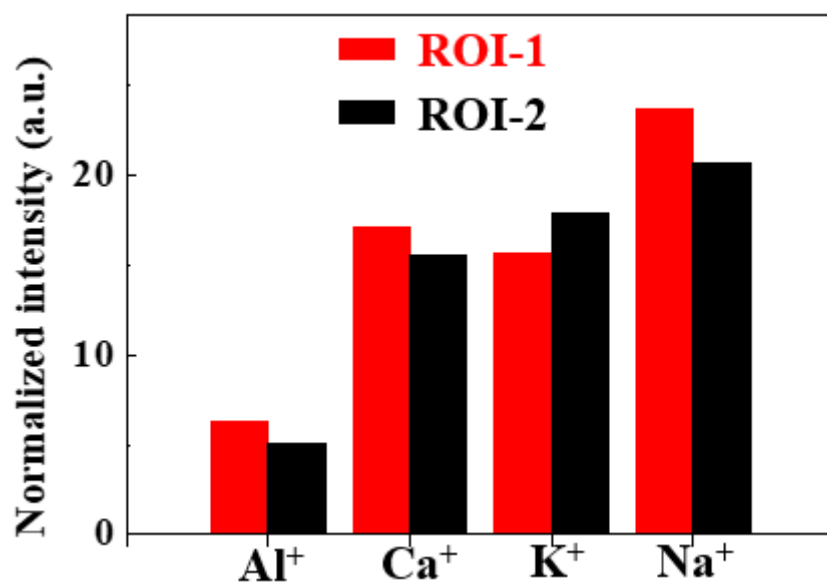

**Figure S2:** Comparison of the normalized ToF-SIMS peak intensities of the ToF-SIMS positive secondary ion spectra recorded over two different regions (ROI-1 and ROI-2) and acquired from ToF-SIMS positive secondary ion image obtained using the ToF-SIMS fast imaging mode for Case I (bright).

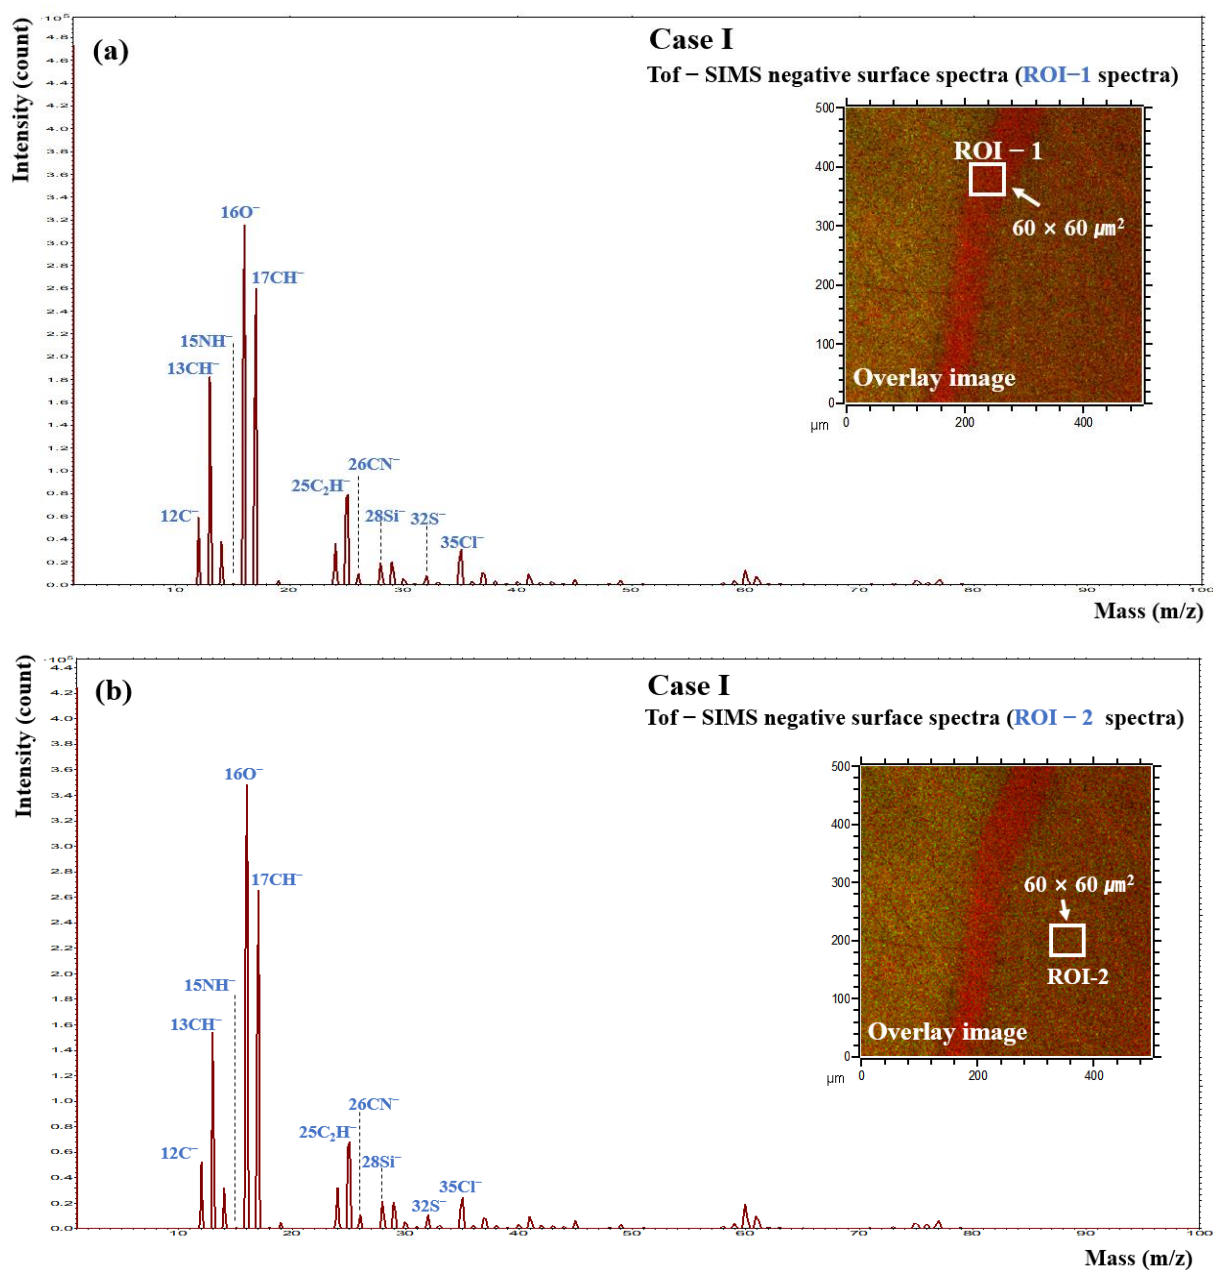

**Figure S3:** ToF-SIMS negative secondary ion spectra recorded over two different regions: (a) ROI-1 and (b) ROI-2. The spectra were acquired from the ToF-SIMS positive secondary ion images obtained using the ToF-SIMS fast imaging mode for Case I (bright).

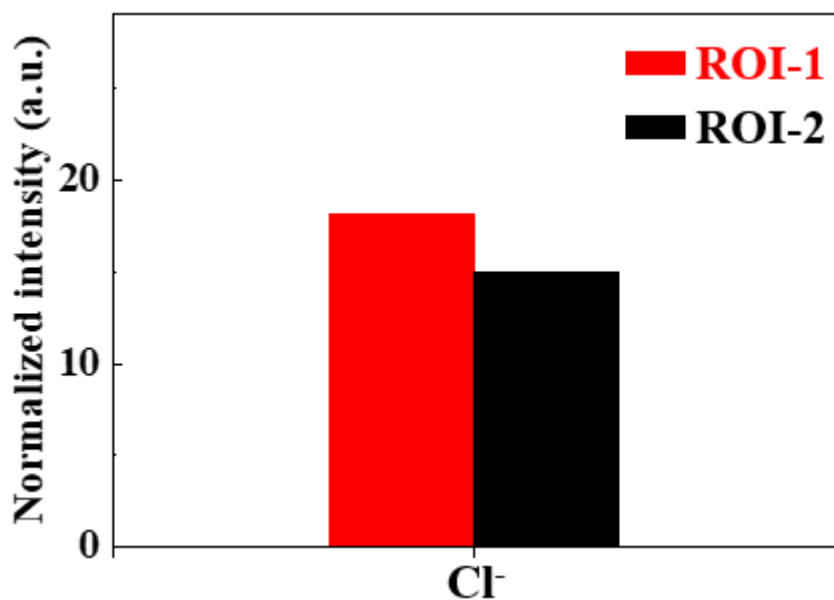

**Figure S4:** Comparison of the normalized ToF-SIMS peak intensities of the ToF-SIMS negative secondary ion spectra recorded over two different regions (ROI-1 and ROI-2) and acquired from ToF-SIMS positive secondary ion image obtained using the ToF-SIMS fast imaging mode for Case I (bright).

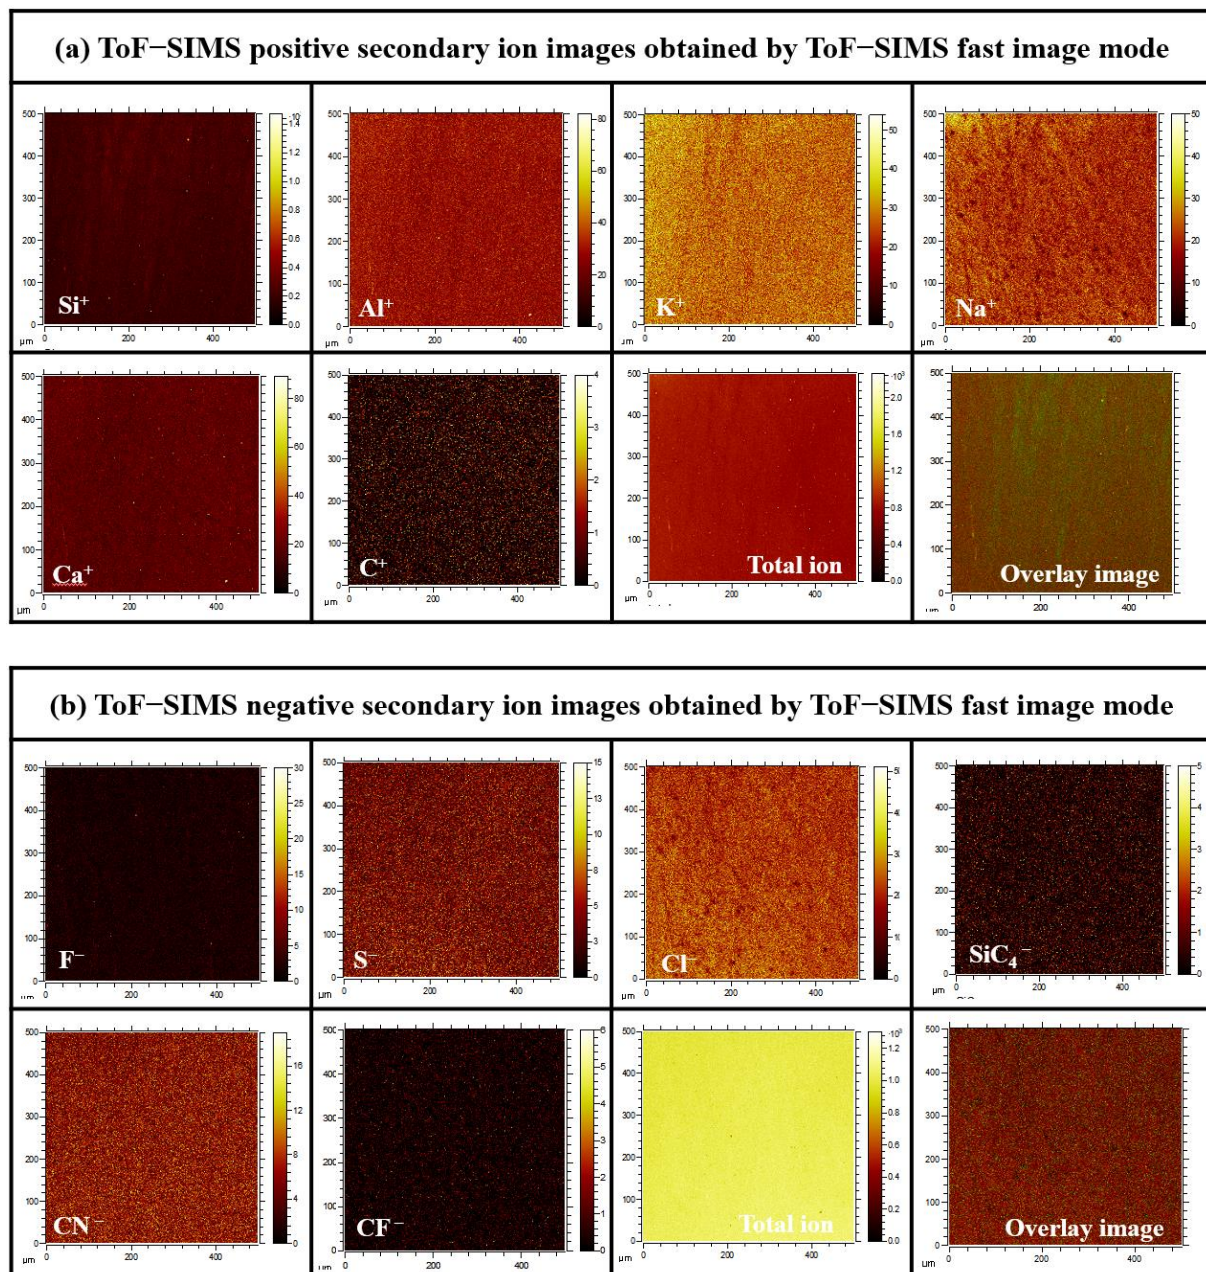

**Figure S5:** ToF-SIMS (a) positive and (b) negative secondary ion images obtained using the ToF-SIMS fast imaging mode for Case II (dark) in the obtained 4H-SiC single crystal.
